# Supplementary material
Source: Springer Nature journal article supplement (https://www.springerprofessional.de/resource/supplementary/13638_2011_141_MOESM4_ESM.pdf/11897132)

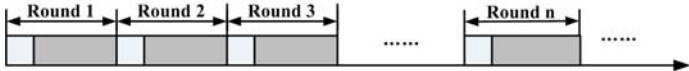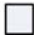

**Set-up phase**

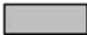

**Steady-state phase**

Supplement: MOESM4 [file 11897132]
